# Supplementary material
Source: HighWire-hosted journal article supplement (https://informatics.bmj.com/content/30/1/e100683)
Supplement: inline-supplementary-material-1 [file inline-supplementary-material-1.pdf]

## SUPPLEMENTARY MATERIALS

**Table S1.** Preferred Reporting Items for Systematic reviews and Meta-Analyses extension for Scoping Reviews (PRISMA-ScR) Checklist

| SECTION                           | ITEM | PRISMA-ScR CHECKLIST ITEM                                                                                                                                                                                                                                                                                  | REPORTED ON PAGE # |
|-----------------------------------|------|------------------------------------------------------------------------------------------------------------------------------------------------------------------------------------------------------------------------------------------------------------------------------------------------------------|--------------------|
| <b>TITLE</b>                      |      |                                                                                                                                                                                                                                                                                                            |                    |
| Title                             | 1    | Identify the report as a scoping review.                                                                                                                                                                                                                                                                   | 1                  |
| <b>ABSTRACT</b>                   |      |                                                                                                                                                                                                                                                                                                            |                    |
| Structured summary                | 2    | Provide a structured summary that includes (as applicable): background, objectives, eligibility criteria, sources of evidence, charting methods, results, and conclusions that relate to the review questions and objectives.                                                                              | 2                  |
| <b>INTRODUCTION</b>               |      |                                                                                                                                                                                                                                                                                                            |                    |
| Rationale                         | 3    | Describe the rationale for the review in the context of what is already known. Explain why the review questions/objectives lend themselves to a scoping review approach.                                                                                                                                   | 3-4                |
| Objectives                        | 4    | Provide an explicit statement of the questions and objectives being addressed with reference to their key elements (e.g., population or participants, concepts, and context) or other relevant key elements used to conceptualize the review questions and/or objectives.                                  | 4                  |
| <b>METHODS</b>                    |      |                                                                                                                                                                                                                                                                                                            |                    |
| Protocol and registration         | 5    | Indicate whether a review protocol exists; state if and where it can be accessed (e.g., a Web address); and if available, provide registration information, including the registration number.                                                                                                             | NA                 |
| Eligibility criteria              | 6    | Specify characteristics of the sources of evidence used as eligibility criteria (e.g., years considered, language, and publication status), and provide a rationale.                                                                                                                                       | 5-6                |
| Information sources*              | 7    | Describe all information sources in the search (e.g., databases with dates of coverage and contact with authors to identify additional sources), as well as the date the most recent search was executed.                                                                                                  | 6                  |
| Search                            | 8    | Present the full electronic search strategy for at least 1 database, including any limits used, such that it could be repeated.                                                                                                                                                                            | 5 (Figure 1)       |
| Selection of sources of evidence† | 9    | State the process for selecting sources of evidence (i.e., screening and eligibility) included in the scoping review.                                                                                                                                                                                      | 5-6 (Figure 2)     |
| Data charting process‡            | 10   | Describe the methods of charting data from the included sources of evidence (e.g., calibrated forms or forms that have been tested by the team before their use, and whether data charting was done independently or in duplicate) and any processes for obtaining and confirming data from investigators. | 5-6                |
| Data items                        | 11   | List and define all variables for which data were sought and any assumptions and simplifications made.                                                                                                                                                                                                     | 6-7                |

| SECTION                                               | ITEM | PRISMA-ScR CHECKLIST ITEM                                                                                                                                                                             | REPORTED ON PAGE #               |
|-------------------------------------------------------|------|-------------------------------------------------------------------------------------------------------------------------------------------------------------------------------------------------------|----------------------------------|
| Critical appraisal of individual sources of evidence§ | 12   | If done, provide a rationale for conducting a critical appraisal of included sources of evidence; describe the methods used and how this information was used in any data synthesis (if appropriate). | NA                               |
| Synthesis of results                                  | 13   | Describe the methods of handling and summarizing the data that were charted.                                                                                                                          | 6                                |
| <b>RESULTS</b>                                        |      |                                                                                                                                                                                                       |                                  |
| Selection of sources of evidence                      | 14   | Give numbers of sources of evidence screened, assessed for eligibility, and included in the review, with reasons for exclusions at each stage, ideally using a flow diagram.                          | 7                                |
| Characteristics of sources of evidence                | 15   | For each source of evidence, present characteristics for which data were charted and provide the citations.                                                                                           | Supplementary material, Table S2 |
| Critical appraisal within sources of evidence         | 16   | If done, present data on critical appraisal of included sources of evidence (see item 12).                                                                                                            | NA                               |
| Results of individual sources of evidence             | 17   | For each included source of evidence, present the relevant data that were charted that relate to the review questions and objectives.                                                                 | 8-9                              |
| Synthesis of results                                  | 18   | Summarize and/or present the charting results as they relate to the review questions and objectives.                                                                                                  | 10                               |
| <b>DISCUSSION</b>                                     |      |                                                                                                                                                                                                       |                                  |
| Summary of evidence                                   | 19   | Summarize the main results (including an overview of concepts, themes, and types of evidence available), link to the review questions and objectives, and consider the relevance to key groups.       | 11-14                            |
| Limitations                                           | 20   | Discuss the limitations of the scoping review process.                                                                                                                                                | 14                               |
| Conclusions                                           | 21   | Provide a general interpretation of the results with respect to the review questions and objectives, as well as potential implications and/or next steps.                                             | 13-14                            |
| <b>FUNDING</b>                                        |      |                                                                                                                                                                                                       |                                  |
| Funding                                               | 22   | Describe sources of funding for the included sources of evidence, as well as sources of funding for the scoping review. Describe the role of the funders of the scoping review.                       | 15                               |

Table S2. Scoping review results

| Authors, year                   | Country            | Setting (number of sites)          | Clinical area                           | CDSS              | Platform                             | CDSS aim                     | Study design                | Baseline patient complexity | Intervention duration | CDSS users             | Study phases                 | Pharmacist participation | Training before intervention | Informative report to patients | Follow-up | Primary outcome                                   | Results                         |
|---------------------------------|--------------------|------------------------------------|-----------------------------------------|-------------------|--------------------------------------|------------------------------|-----------------------------|-----------------------------|-----------------------|------------------------|------------------------------|--------------------------|------------------------------|--------------------------------|-----------|---------------------------------------------------|---------------------------------|
| Blum MR, et al. 2021 [1]        | Switzerland        | hospital (multicentric)            | geriatrics                              | rule-based        | web-based software                   | prescriptive appropriateness | RCT                         | polymedicated               | 19-24 months          | multidisciplinary team | intervention                 | yes                      | no                           | no                             | yes       | number of (re-)hospitalizations                   | outcome non-achieved            |
| Qu J, et al. 2021 [2]           | China              | hospital (multicentric)            | cardiology                              | guidelines        | smartphone-based application         | medication review            | RCT                         | NA                          | 13-18 months          | multidisciplinary team | intervention                 | no                       | yes                          | no                             | no        | prescription rate of drugs of interest            | outcome non-achieved            |
| Mastriani A, et al. 2021 [3]    | USA                | hospital (monocentric)             | pediatrics                              | digital checklist | integrated into a vital sign monitor | disease management           | pre-post intervention study | need for resuscitation      | ≤ 6 months            | multidisciplinary team | pre-post CDSS implementation | no                       | no                           | no                             | no        | percent of vital signs documented                 | outcome only partially achieved |
| Menon S, et al. 2021 [4]        | USA                | hospital (monocentric)             | pediatrics                              | guidelines        | integrated into EHR                  | AKI detection                | pre-post intervention study | chronic kidney disease      | ≤ 6 months            | multidisciplinary team | pre-post CDSS implementation | no                       | yes                          | no                             | yes       | AKI progression                                   | outcome achieved                |
| Wasylewicz ATM, et al. 2021 [5] | The Netherlands    | hospital (monocentric)             | hospitalized patients with feeding tube | guidelines        | NA                                   | medication error detection   | pre-post intervention study | need for feeding tube       | ≤ 6 months            | pharmacist             | pre-post CDSS implementation | yes                      | yes                          | no                             | no        | number of feeding tube-related medication errors  | outcome achieved                |
| Bourdeux C, et al. 2020 [6]     | The United Kingdom | hospital (monocentric)             | nephrology                              | guidelines        | web-based software                   | AKI detection                | pre-post intervention study | NA                          | 7-12 months           | multidisciplinary team | pre-post CDSS implementation | yes                      | yes                          | no                             | no        | AKI progression                                   | outcome achieved                |
| Lee V, et al. 2020 [7]          | Canada             | hospital (monocentric)             | pediatrics                              | predictive models | smartphone-based application         | risk score assessment        | pre-post intervention study | NA                          | ≤ 6 months            | nurse                  | pre-post CDSS implementation | no                       | yes                          | no                             | no        | time to administration of intravenous antibiotics | outcome achieved                |
| Holland WC, et al. 2020 [8]     | USA                | emergency department (monocentric) | substance use disorder                  | rule-based        | integrated into EHR                  | disease management           | pre-post intervention study | opioid use disorder         | 7-12 months           | clinician              | pre-post CDSS implementation | no                       | yes                          | no                             | no        | prescription rate of drugs of interest            | outcome achieved                |

|                                |                    |                                    |                        |            |                      |                              |                                            |                                  |              |                        |                              |     |     |     |     |                                                            |                                 |
|--------------------------------|--------------------|------------------------------------|------------------------|------------|----------------------|------------------------------|--------------------------------------------|----------------------------------|--------------|------------------------|------------------------------|-----|-----|-----|-----|------------------------------------------------------------|---------------------------------|
| Murphy ME, et al. 2020 [9]     | Ireland            | GP clinic (multicentric)           | diabetology            | rule-based | web-based software   | disease management           | RCT                                        | diabetes                         | NA           | GP                     | intervention                 | no  | yes | no  | no  | impact on glycemic control                                 | outcome non-achieved            |
| Tao L, et al. 2020 [10]        | China              | hospital (monocentric)             | hospitalized patients  | AI-based   | integrated into EHR  | diagnosis                    | retrospective, observational study         | NA                               | > 24 months  | researcher             | pre-post CDSS implementation | no  | no  | no  | no  | diagnosis accuracy                                         | outcome achieved                |
| Moja L, et al. 2019 [11]       | Italy              | hospital (monocentric)             | hospitalized patients  | rule-based | integrated into EHR  | prescriptive appropriateness | RCT                                        | comorbidities                    | 13-18 months | clinician              | intervention                 | no  | no  | no  | no  | resolution rate of medical problems identified             | outcome non-achieved            |
| Bean DM, et al. 2019 [12]      | The United Kingdom | hospital (monocentric)             | cardiology             | rule-based | integrated into EHR  | risk score assessment        | retrospective, observational study         | comorbidities                    | > 24 months  | researcher             | intervention                 | no  | no  | no  | no  | risk score assessment                                      | outcome achieved                |
| McDonald EG, et al. 2019 [13]  | Canada             | hospital (multicentric)            | geriatrics             | rule-based | web-based software   | deprescription               | pre-post intervention study                | comorbidities                    | 7-12 months  | multidisciplinary team | pre-post CDSS implementation | yes | no  | yes | yes | proportion of appropriate or inappropriate prescriptions   | outcome achieved                |
| Halpin KL, et al. 2019 [14]    | USA                | emergency department (monocentric) | pediatrics             | rule-based | integrated into EHR  | disease management           | retrospective, observational study         | adrenal insufficiency            | 19-24 months | clinician              | pre-post CDSS implementation | no  | no  | no  | no  | prescription rate of drugs of interest                     | outcome only partially achieved |
| Campbell NL, et al. 2019 [15]  | USA                | hospital (multicentric)            | neurology              | rule-based | integrated into EHR  | deprescription               | RCT                                        | comorbidities                    | ≤ 6 months   | pharmacist             | intervention                 | yes | no  | no  | no  | delirium duration and severity                             | outcome non-achieved            |
| Seal KH, et al. 2019 [16]      | USA                | hospital (monocentric)             | substance use disorder | guidelines | NA                   | disease management           | RCT                                        | high risk of opioid use disorder | 19-24 months | multidisciplinary team | intervention                 | no  | yes | yes | no  | feasibility of the intervention and patients' satisfaction | outcome non-achieved            |
| Stipelman CH, et al. 2019 [17] | USA                | hospital (monocentric)             | infectious diseases    | rule-based | integrated into EHR  | risk score assessment        | pre-post intervention study, retrospective | NA                               | > 24 months  | multidisciplinary team | pre-post CDSS implementation | no  | yes | no  | no  | risk score assessment                                      | outcome achieved                |
| Choi KS, et al.                | South Korea        | hospital (monocentric)             | nephrology             | rule-based | integrated into CPOE | medication review            | retrospective, observational               | chronic kidney disease           | ≤ 6 months   | multidisciplinary team | intervention                 | yes | no  | no  | no  | proportion of appropriate                                  | outcome achieved                |

|                                  |                 |                                    |                                               |                   |                     |                              |                                   |                             |              |                        |                              |     |     |     |    |                                                          |                                 |
|----------------------------------|-----------------|------------------------------------|-----------------------------------------------|-------------------|---------------------|------------------------------|-----------------------------------|-----------------------------|--------------|------------------------|------------------------------|-----|-----|-----|----|----------------------------------------------------------|---------------------------------|
| 2019 [18]                        |                 |                                    |                                               |                   |                     |                              | onal study                        |                             |              |                        |                              |     |     |     |    | ate or inappropriate prescriptions                       |                                 |
| Muth C, et al. 2018 [19]         | Germany         | GP clinic (multicentric)           | geriatrics                                    | rule-based        | NA                  | medication review            | RCT                               | polymedicated               | NA           | multidisciplinary team | intervention                 | no  | yes | no  | no | prescription rate of drugs of interest                   | outcome non-achieved            |
| Bond SE, et al. 2017 [20]        | Australia       | hospital (multicentric)            | infectious diseases                           | guidelines        | web-based software  | prescriptive appropriateness | pre-post intervention study       | NA                          | 19-24 months | multidisciplinary team | pre-post CDSS implementation | yes | yes | no  | no | proportion of appropriate or inappropriate prescriptions | outcome achieved                |
| Berrevorts MAH, et al. 2017 [21] | The Netherlands | hospital (monocentric)             | infectious diseases                           | guidelines        | NA                  | antimicrobial prescription   | RCT                               | infectious disease          | > 24 months  | clinician              | pre-post CDSS implementation | yes | yes | no  | no | proportion of appropriate or inappropriate prescriptions | outcome achieved                |
| Shah AC, et al. 2019 [22]        | USA             | hospital (monocentric)             | hospitalized patients with general anesthesia | rule-based        | integrated into EHR | anesthesia management        | pre-post intervention study       | need for general anesthesia | ≤ 6 months   | clinician              | pre-post CDSS implementation | yes | no  | no  | no | compliance with epidural infusion initiation             | outcome achieved                |
| Hulyalkar M, et al. 2017 [23]    | USA             | hospital (monocentric)             | pediatrics                                    | digital checklist | NA                  | disease management           | pre-post intervention study       | children                    | ≤ 6 months   | researcher             | intervention                 | no  | no  | no  | no | risk score assessment                                    | outcome achieved                |
| Lipatov K, et al. 2022 [24]      | USA             | emergency department (monocentric) | infectious diseases                           | AI-based          | NA                  | disease management           | retrospective observational study | infectious disease          | > 24 months  | clinician              | pre-post CDSS implementation | no  | no  | no  | no | risk score assessment                                    | outcome non-achieved            |
| Fried TR, et al. 2017 [25]       | USA             | hospital (monocentric)             | geriatrics                                    | rule-based        | integrated into EHR | prescriptive appropriateness | RCT                               | polymedicated (excessive)   | 13-18 months | clinician              | intervention                 | no  | no  | yes | no | patient-clinician medication-related communication       | outcome only partially achieved |
| Kercsmar CM, et al. 2019 [26]    | USA             | clinical center (multicentric)     | respiratory diseases                          | guidelines        | NA                  | asthma management            | RCT                               | asthma                      | > 24 months  | multidisciplinary team | intervention                 | no  | yes | no  | no | asthma control                                           | outcome achieved                |

|                                         |           |                                  |                                    |                   |                              |                              |                                    |                           |              |                        |                              |     |     |     |     |                                                          |                                 |
|-----------------------------------------|-----------|----------------------------------|------------------------------------|-------------------|------------------------------|------------------------------|------------------------------------|---------------------------|--------------|------------------------|------------------------------|-----|-----|-----|-----|----------------------------------------------------------|---------------------------------|
| Spat S, et al. <b>2017</b> [27]         | Austria   | hospital (monocentric)           | diabetology                        | rule-based        | smartphone-based application | disease management           | noncontrolled intervention study   | diabetes                  | NA           | multidisciplinary team | intervention                 | no  | yes | no  | no  | impact on glycemic control                               | outcome achieved                |
| Webster R, et al. <b>2021</b> [28]      | Australia | GP clinic (multicentric)         | cardiology                         | rule-based        | smartphone-based application | medication review            | RCT                                | comorbidities             | NA           | multidisciplinary team | intervention                 | yes | yes | no  | no  | proportion of appropriate or inappropriate prescriptions | outcome non-achieved            |
| Kharbanda EO, et al. <b>2018</b> [29]   | USA       | clinical center (multicentric)   | pediatrics                         | predictive models | integrated into EHR          | hypertension recognition     | RCT                                | children                  | 19-24 months | multidisciplinary team | intervention                 | no  | no  | no  | yes | hypertension recognition                                 | outcome achieved                |
| Elliott LS, et al. <b>2017</b> [30]     | USA       | community pharmacy (monocentric) | chronically ill patients           | rule-based        | web-based software           | medication review            | RCT                                | high risk drugs           | 7-12 months  | pharmacist             | intervention                 | yes | no  | no  | no  | number of (re)-hospitalizations                          | outcome achieved                |
| Kim K, et al. <b>2018</b> [31]          | USA       | community pharmacy (NA)          | chronically ill patients           | rule-based        | web-based software           | prescriptive appropriateness | RCT                                | polymedicated             | NA           | pharmacist             | intervention                 | yes | no  | yes | no  | proportion of appropriate or inappropriate prescriptions | outcome achieved                |
| Kessler S, et al. <b>2021</b> [32]      | USA       | hospital (NA)                    | chronically ill patients           | AI-based          | web-based software           | medication review            | retrospective, observational study | polymedicated (excessive) | 13-18 months | multidisciplinary team | intervention                 | yes | no  | no  | no  | number of (re)-hospitalizations                          | outcome achieved                |
| Tamblyn R, Aet al. <b>2019</b> [33]     | Canada    | hospital (multicentric)          | hospitalized patients with surgery | rule-based        | integrated into EHR          | medication review            | RCT                                | comorbidities             | > 24 months  | multidisciplinary team | intervention                 | yes | no  | no  | yes | proportion of adverse drug events                        | outcome only partially achieved |
| Mainous AG 3rd, et al. <b>2018</b> [34] | USA       | GP clinic (multicentric)         | hematology                         | rule-based        | integrated into EHR          | disease management           | quasi experimental design          | NA                        | ≤ 6 months   | GP                     | pre-post CDSS implementation | no  | yes | no  | no  | number of appropriate ferritin tests order               | outcome achieved                |
| Winata S, et al. <b>2021</b> [35]       | Australia | hospital (monocentric)           | geriatrics                         | rule-based        | integrated into EHR          | deprescription               | pre-post intervention study        | NA                        | ≤ 6 months   | multidisciplinary team | pre-post CDSS implementation | yes | yes | no  | no  | proportion of appropriate or inappropriate prescriptions | outcome non-achieved            |

|                                  |                    |                          |                                                |            |                      |                              |                                    |                              |              |            |                              |     |     |     |    |                                                          |                                 |
|----------------------------------|--------------------|--------------------------|------------------------------------------------|------------|----------------------|------------------------------|------------------------------------|------------------------------|--------------|------------|------------------------------|-----|-----|-----|----|----------------------------------------------------------|---------------------------------|
| Reynolds EL, et al. 2020 [36]    | USA                | hospital (monocentric)   | nephrology                                     | rule-based | integrated into EHR  | medication review            | RCT                                | neuropathy                   | NA           | clinician  | intervention                 | no  | no  | yes | no | proportion of appropriate or inappropriate prescriptions | outcome non-achieved            |
| Vijayakumar VK, et al. 2021 [37] | Norway             | GP clinic (multicentric) | respiratory diseases                           | guidelines | web-based software   | disease management           | RCT                                | COPD                         | NA           | GP         | intervention                 | no  | no  | no  | no | proportion of appropriate or inappropriate prescriptions | outcome only partially achieved |
| Gupta S, et al. 2019 [38]        | Canada             | hospital (multicentric)  | respiratory diseases                           | guidelines | integrated into EHR  | asthma management            | pre-post intervention study        | asthma                       | 19-24 months | clinician  | pre-post CDSS implementation | no  | yes | yes | no | asthma control                                           | outcome achieved                |
| Pouliot JD, et al. 2018 [39]     | USA                | hospital (monocentric)   | hospitalized patients with epidural anesthesia | guidelines | integrated into CPOE | medication review            | retrospective, observational study | need for epidural anesthesia | ≤ 6 months   | clinician  | pre-post CDSS implementation | no  | no  | no  | no | proportion of appropriate or inappropriate prescriptions | outcome non-achieved            |
| Heard KL, et al. 2019 [40]       | The United Kingdom | hospital (monocentric)   | infectious diseases                            | guidelines | integrated into EHR  | antimicrobial prescription   | retrospective observational study  | infectious disease           | ≤ 6 months   | pharmacist | pre-post CDSS implementation | yes | no  | no  | no | number of cases reviewed using the CDSS                  | outcome achieved                |
| Wasylewicz ATM, et al. 2021 [41] | The Netherlands    | hospital (monocentric)   | hospitalized patients with feeding tube        | guidelines | integrated into EHR  | prescriptive appropriateness | pre-post intervention study        | need for feeding tube        | ≤ 6 months   | pharmacist | pre-post CDSS implementation | yes | yes | no  | no | number of feeding tube related medication errors         | outcome achieved                |
| Aziz MT, et al. 2021 [42]        | Pakistan           | hospital (monocentric)   | oncology                                       | rule-based | integrated into CPOE | medication review            | observational study                | cancer                       | 7-12 months  | pharmacist | intervention                 | yes | yes | no  | no | number of medication errors                              | outcome achieved                |

Abbreviation: CDSS, Clinical Decision Support System; RCT, Randomized Controlled Trial; HER, Electronic Health Record; AKI, Acute Kidney Injury; AI, Artificial Intelligence; CPOE, Computerized Provider Order Entry; NA, Not Applicable; GP, General Practitioner; COPD, Chronic Obstructive Pulmonary Disease

Figure S3. Process steps for conducting effective studies with CDSSs

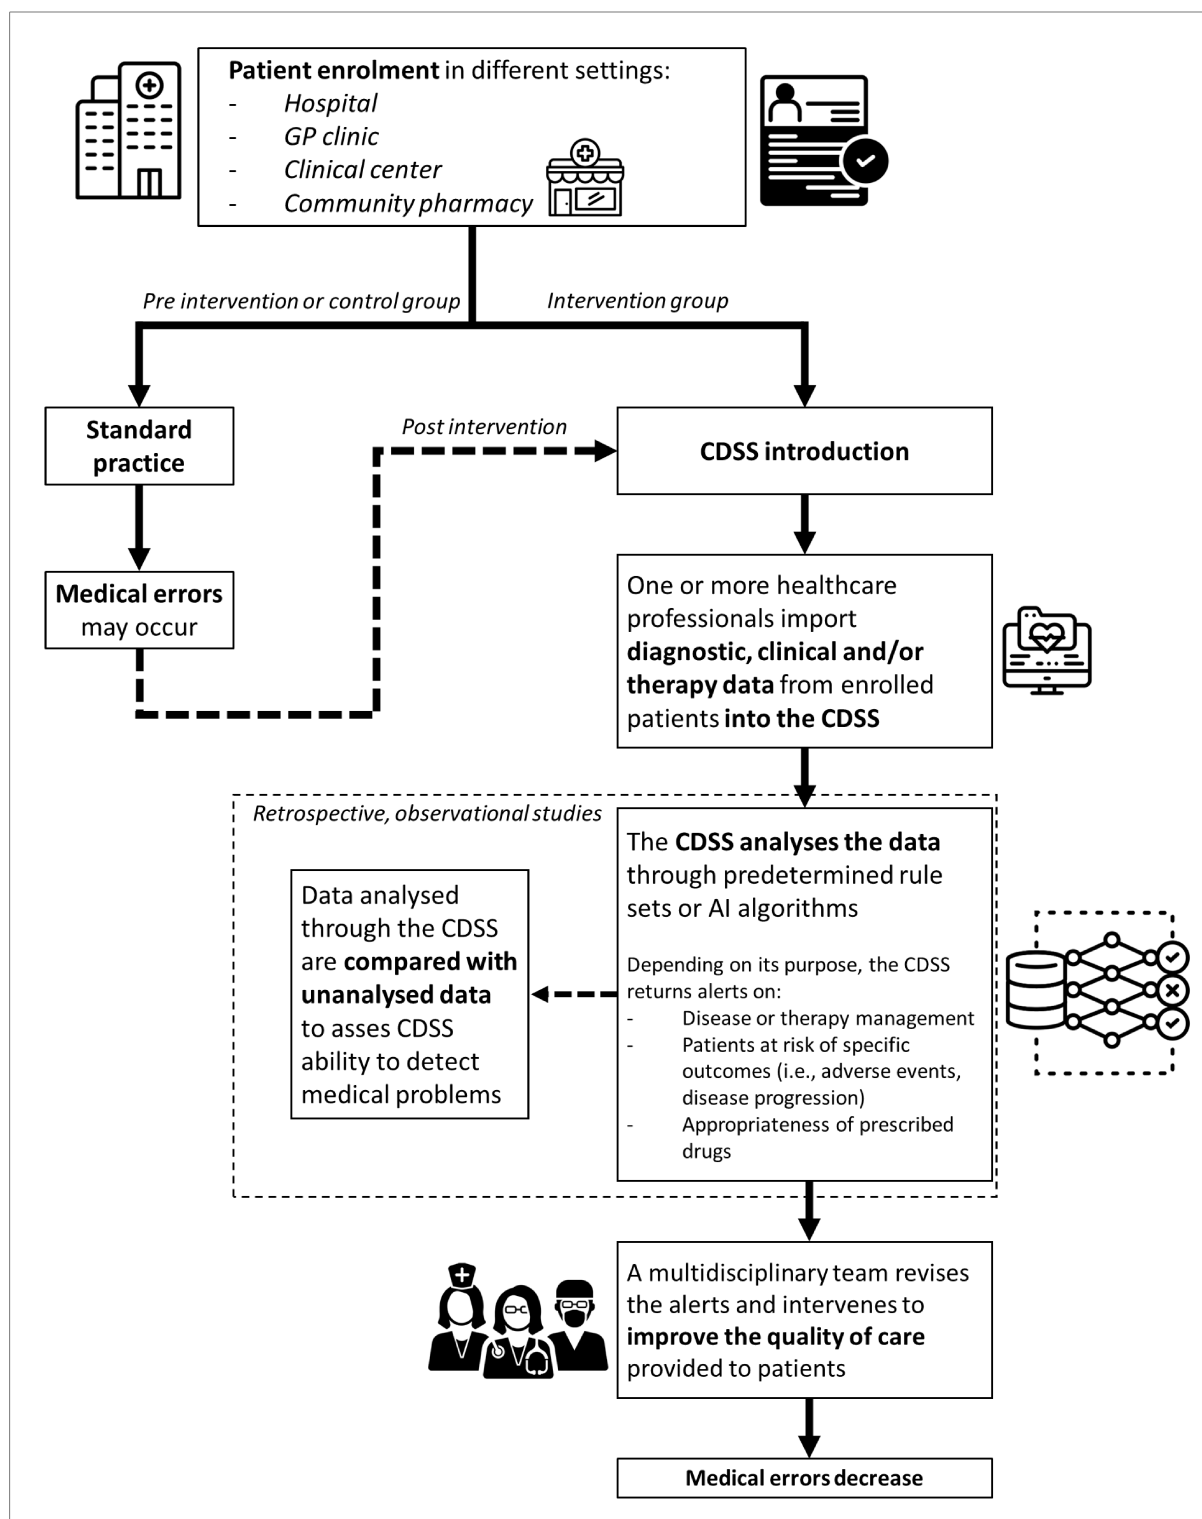

Abbreviations: GP, general practitioner; CDSS, clinical decision support system; AI, artificial intelligence



## REFERENCES

- 1 Blum MR, Sallevelt BTGM, Spinewine A, et al. Optimizing Therapy to Prevent Avoidable Hospital Admissions in Multimorbid Older Adults (OPERAM): Cluster randomised controlled trial. *BMJ* 2021;374:n1585. 10.1136/bmj.n1585
- 2 Qu J, Du J, Rao C, et al. Effect of a smartphone-based intervention on secondary prevention medication prescriptions after coronary artery bypass graft surgery: The MISSION-1 randomized controlled trial. *American Heart Journal* 2021;237:79-89. 10.1016/j.ahj.2021.03.005
- 3 Mastrianni A, Sarcevic A, Chung L, et al. Designing Interactive Alerts to Improve Recognition of Critical Events in Medical Emergencies. *DIS'21* 2021;864-878. 10.1145/3461778.3462051
- 4 Menon S, Tarrago R, Carlin K, et al. Impact of integrated clinical decision support systems in the management of pediatric acute kidney injury: a pilot study. *Pediatric Research* 2021;89:1164-1170. 10.1038/s41390-020-1046-8
- 5 Wasylewicz ATM, van Grinsven RJB, Bikker JMW, et al. Clinical Decision Support System-Assisted Pharmacy Intervention Reduces Feeding Tube-Related Medication Errors in Hospitalized Patients: A Focus on Medication Suitable for Feeding-Tube Administration. *Journal of Parenteral and Enteral Nutrition* 2021; 45(3):625-632. 10.1002/jpen.1869
- 6 Bourdeaux C, Ghosh E, Atallah L, et al. Impact of a computerized decision support tool deployed in two intensive care units on acute kidney injury progression and guideline compliance: a prospective observational study. *Crit Care* 2020;24:656. 10.1186/s13054-020-03343-1
- 7 Lee V, Dunsmuir D, Businge S, et al. Evaluation of a digital triage platform in Uganda: A quality improvement initiative to reduce the time to antibiotic administration. *Plos One* 2020. 10.1371/journal.pone.0240092
- 8 Holland WC, Nath B, Li F, et al. Interrupted Time Series of User-centered Clinical Decision Support Implementation for Emergency Department-initiated Buprenorphine for Opioid Use Disorder. *Academic Emergency Medicine* 2020;27(8):753-763. 10.1111/acem.14002
- 9 Murphy ME, McSharry J, Byrne M, et al. Supporting care for suboptimally controlled type 2 diabetes mellitus in general practice with a clinical decision support system: A mixed methods pilot cluster randomised trial. *BMJ Open* 2020;10:e032594. 10.1136/bmjopen-2019-032594

- 10 Tao L, Zhang C, Zeng L, et al. Accuracy and effects of clinical decision support systems integrated with BMJ best practice-aided diagnosis: Interrupted time series study. *JMIR Med Inform* 2020;8:e16912. 10.2196/16912
- 11 Moja L, Polo Friz H, Capobussi M, et al. Effectiveness of a Hospital-Based Computerized Decision Support System on Clinician Recommendations and Patient Outcomes: A Randomized Clinical Trial. *JAMA Network Open* 2019;2(12):e1917094. 10.1001/jamanetworkopen.2019.17094
- 12 Bean DM, Teo J, Wu H, et al. Semantic computational analysis of anticoagulation use in atrial fibrillation from real world data. *Plos One* 2019. 10.1371/journal.pone.0225625
- 13 McDonald EG, Wu PE, Rashidi B, et al. The MedSafer Study: A Controlled Trial of an Electronic Decision Support Tool for Deprescribing in Acute Care. *JAGS* 2019;67:1843-1850. 10.1111/jgs.16040
- 14 Halpin KL, Paprocki EL, McDonough RJ. Utilizing health information technology to improve the recognition and management of life-threatening adrenal crisis in the pediatric emergency department: Medical alert identification in the 21st century. *J Pediatr Endocrinol Metab* 2019;32(5):513-518. 10.1515/jpem-2018-0566
- 15 Campbell NL, Perkins AJ, Khan BA, et al. Deprescribing in the Pharmacologic Management of Delirium: A Randomized Trial in the Intensive Care Unit. *JAGS* 2019;00. 10.1111/jgs.15751
- 16 Seal KH, Borsari B, Tighe J, et al. Optimizing pain treatment interventions (OPTI): A pilot randomized controlled trial of collaborative care to improve chronic pain management and opioid safety—Rationale, methods, and lessons learned. *Contemporary Clinical Trials* 2019;77:76-85. 10.1016/j.cct.2018.12.006
- 17 Stipelman CH, Smith ER, Diaz-Ochu M, et al. Early-onset sepsis risk calculator integration into an electronic health record in the nursery. *Pediatrics* 2019;144(2):e20183464. 10.1542/peds.2018-3464
- 18 Choi KS, Lee E, Rhie SJ. Impact of pharmacists' interventions on physicians' decision of a knowledge-based renal dosage adjustment system. *International Journal of Clinical Pharmacy* 2019;41:424-433. 10.1007/s11096-019-00796-5
- 19 Muth C, Uhlmann L, Haefeli WE, et al. Effectiveness of a complex intervention on Prioritising Multimedication in Multimorbidity (PRIMUM) in primary care: Results of a pragmatic cluster randomised controlled trial. *BMJ Open* 2018;8:e017740. 10.1136/bmjopen-2017-017740

- 20 Bond SE, Chubaty AJ, Adhikari S, et al. Outcomes of multisite antimicrobial stewardship programme implementation with a shared clinical decision support system. *J Antimicrob Chemother* 2017;72:2110-2118. 10.1093/jac/dkx080
- 21 Berrevoets MAH, Pot JHLW, Houterman AE, et al. An electronic trigger tool to optimise intravenous to oral antibiotic switch: A controlled, interrupted time series study. *Antimicrobial Resistance and Infection Control* 2017;6:81. 10.1186/s13756-017-0239-3
- 22 Shah AC, Nair BG, Spiekerman CF, et al. Process optimization and digital quality improvement to enhance timely initiation of epidural infusions and postoperative pain control. *Anesth Analg* 2019;128(5):953-961. 10.1213/ANE.0000000000003742
- 23 Hulyalkar M, Gleich SJ, Kashyap R, et al. Design and  $\alpha$ -testing of an electronic rounding tool (CERTAINp) to improve process of care in pediatric intensive care unit. *J Clin Monit Comput* 2017;31:1313-1320. 10.1007/s10877-016-9946-1
- 24 Lipatov K, Daniels CE, Park JG, et al. Implementation and evaluation of sepsis surveillance and decision support in medical ICU and emergency department. *American Journal of Emergency Medicines* 2022;51:378-383. 10.1016/j.ajem.2021.09.086
- 25 Fried TR, Niehoff KM, Street RL, et al. Effect of the Tool to Reduce Inappropriate Medications on Medication Communication and Deprescribing. *JAGS* 2017;65(10):2265-2271. 10.1111/jgs.15042
- 26 Kercksmar CM, Sorkness CA, Calatroni A, et al. A computerized decision support tool to implement asthma guidelines for children and adolescents. *J Allergy Clin Immunol* 2019;143(5):1760-1768. 10.1016/j.jaci.2018.10.060
- 27 Spat S, Donsa K, Beck P, et al. A Mobile Computerized Decision Support System to Prevent Hypoglycemia in Hospitalized Patients With Type 2 Diabetes Mellitus. *Journal of Diabetes Science and Technology* 2017;11(1):20-28. 10.1177/1932296816676501
- 28 Webster R, Usherwood T, Joshi R, et al. An electronic decision support-based complex intervention to improve management of cardiovascular risk in primary health care: a cluster randomised trial (INTEGRATE). *Med J Aust*. 2021;214(9):420-427. 10.5694/mja2.51030

- 29 Kharbanda EO, Asche SE, Sinaiko AR, et al. Clinical Decision Support for Recognition and Management of Hypertension: A Randomized Trial. *Pediatrics* 2018;141(2):e20172954. 10.1542/peds.2017-2954
- 30 Elliott LS, Henderson JC, Neradilek MB, et al. Clinical impact of pharmacogenetic profiling with a clinical decision support tool in polypharmacy home health patients: A prospective pilot randomized controlled trial. *Plos One* 2017;2. 10.1371/journal.pone.0170905
- 31 Kim K, Magness JW, Nelson R, et al. Clinical Utility of Pharmacogenetic Testing and a Clinical Decision Support Tool to Enhance the Identification of Drug Therapy Problems Through Medication Therapy Management in Polypharmacy Patients. *JMCP* 2018;24(12):1251-1259. 10.18553/jmcp.2018.24.12.1250
- 32 Kessler S, Desai M, McConnell W, et al. Economic and utilization outcomes of medication management at a large Medicaid plan with disease management pharmacists using a novel artificial intelligence platform from 2018 to 2019: a retrospective observational study using regression methods. *JMCP* 2021;27(9):1186-1196. 10.18553/jmcp.2021.21036
- 33 Tamblyn R, Abrahamowicz M, Buckeridge DL, et al. Effect of an Electronic Medication Reconciliation Intervention on Adverse Drug Events: A Cluster Randomized Trial. *JAMA Network Open* 2019;2(9): e1910756. 10.1001/jamanetworkopen.2019.10756
- 34 Mainous AG 3rd, Carek PJ, Lynch K, et al. Effectiveness of Clinical Decision Support Based Intervention in the Improvement of Care for Adult Sickle Cell Disease Patients in Primary Care. *JABFM* 2018; 31(5):812-816. 10.3122/jabfm.2018.05.180106
- 35 Winata S, Liacos M, Crabtree A, et al. Electronic Medication Management System Introduction and Deprescribing Practice in Post-Acute Care. *JAMDA* 2021;22:90-95. 10.1016/j.jamda.2020.10.015
- 36 Reynolds EL, Burke JF, Banerjee M, et al. Randomized controlled trial of a clinical decision support system for painful polyneuropathy. *Muscle & Nerve* 2020;61:640-661. 10.1002/mus.26774
- 37 Vijayakumar VK, Mustafa T, Nore BK, et al. Role of a Digital Clinical Decision-Support System in General Practitioners' Management of COPD in Norway. *International Journal of Chronic Obstructive Disease* 2021;16:2327-2336. 10.2147/COPD.S319753
- 38 Gupta S, Price C, Agarwal G, et al. The Electronic Asthma Management System (eAMS) improves primary care asthma management. *Eur Respir J* 2019;53:1802241. 10.1183/13993003.02241-2018

- 39 Pouliot JD, Neal EB, Lobo BL, et al. The Role of Computerized Clinical Decision Support in Reducing Inappropriate Medication Administration During Epidural Therapy. *Hospital Pharmacy* 2018;53(3):170-176. 10.1177/0018578717741392
- [40] Heard KL, Hughes S, Mughal N, et al. Evaluating the impact of the ICNET© clinical decision support system for antimicrobial stewardship. *Antimicrobial Resistance and Infection Control* 2019;8:51. 10.1186/s13756-019-0496-4
- [41] Wasylewicz ATM, van Grinsven RJB, Bikker JMW, et al. CDSS assisted pharmacy intervention reduces feeding tube-related medication errors in hospitalized patients: a focus on medication suitable for feeding tube administration. *J Parenter Enteral Nutr* 2021;45(3):625-632. 10.1002/jpen.1869
- [42] Aziz MT, Er-Rehman T, Qureshi S, et al. Role of the Novel Integrated Clinical Pharmacist Menu Software in Improving Medication Therapy Management. *JPRI* 2021;33(32B):103-114. 10.9734/jpri/2021/v33i32B31749
